# Supplementary material for: Supply chain diversity buffers cities against food shocks
Source: Research Square preprint supplement (doi:10.21203/rs.3.rs-91699/v1), 2020-10-23
Supplement: Supplementary file 1 [file 8bc8886df8e7f87b561fb4e5.docx]

**Supplementary methods**: Description of the five different indicators used to determine supply chain diversity.

**Physical distance indicator (PDI).** The geometric centroids of all geographical areas employed in the study are calculated using the GIS software ArcMap. Then, the PDI is obtained by calculating the Euclidian distance from the centroid of each area to the centroid of all other areas.

**Climate indicator (CI).** To account for different climates across cities in the United States, the Palmer Drought Severity Index (PDSI) is used1. The monthly PDSI was obtained from the National Oceanic and Atmospheric Administration for the years 1895-2015 at the climate division geographic level. An area-weighted average was performed to aggregate the PDSI data to the metropolitan level. The CI is obtained by calculating the monthly correlation between an area and all other areas.

**Urban classification indicator (UCI).** To identify the urbanization level of a geographical area, the Urban-Rural Classification indicator from the National Center for Health Statistics is employed2. The indicator classifies counties using a scale from 1 to 6, where a value of 1 indicates the county is highly rural and a value of 6 means highly urban. The UCI is obtained at the metropolitan-level using an area-weighted average of the county-level values.

**Network modularity indicator (NMI).** This indicator identifies areas or network nodes that belong to the same community. A community is a group of nodes whose strength interactions are stronger than with the rest of the network. To identify the network communities, we aggregated the flows from the four food sectors (crops, live animals, feed, and meat) considered in this study into a single-layer network. The communities were then identified by maximizing the modularity measure of Newman3,4 using the greedy optimization algorithm of Blondel et al.5,6. Network nodes that lie in the same community are assigned a NMI of 1 and 0 otherwise.

**Economic specialization indicator (ESI).** Each area is assigned a score based on the dominant domestic, exporting economic sector of the area. Areas that export mainly crop products are given an ESI of 1, livestock products an ESI of 2, animal feed products an ESI of 3, and meat products an ESI of 4. The dominant exporting sector of each area was determined using the food flow networks derived from the FAF4 database7.

**Supplementary references**

1 The United States National Oceanic and Atmospheric Administration, Historical Palmer Drought Indices*. https://www.ncdc.noaa.gov/temp-and-precip/drought/historical-palmers/*.

2 Ingram, D. & Franco, S. NCHS urban-rural classification scheme for counties. (National Center for Health Statistics, Vital Health Stat, 2013).

3 Newman, M. E. J. Modularity and community structure in networks. *Proceedings of the National Academy of Sciences* **103**, 8577, doi:10.1073/pnas.0601602103 (2006).

4 Girvan, M. & Newman, M. E. J. Community structure in social and biological networks. *Proceedings of the National Academy of Sciences* **99**, 7821-7826, doi:10.1073/pnas.122653799 (2002).

5 Garcia, S. & Mejia, A. Characterizing and modeling subnational virtual water networks of US agricultural and industrial commodity flows. *Advances in Water Resources* **130**, 314-324, doi:https://doi.org/10.1016/j.advwatres.2019.06.013 (2019).

6 Blondel, V. D., Guillaume, J. P., Lambiotte, R. & Lefebvre, E. Fast unfolding of communities in large networks. *Journal of Statistical Mechanics: Theory and Experiment* **2008**, P10008 (2008).

7 Hwang, H. *et al.* The Freight Analysis Framework Version 4 (FAF4), ORNL/TM-2016/489. *Oak Ridge National Laboratory* (2016).
