# Supplementary material for: Supply chain diversity buffers cities against food shocks
Source: Research Square preprint supplement (doi:10.21203/rs.3.rs-91699/v1), 2020-10-23
Supplement: Supplementary file 2 [file 9efc050805b802920036a251.docx]

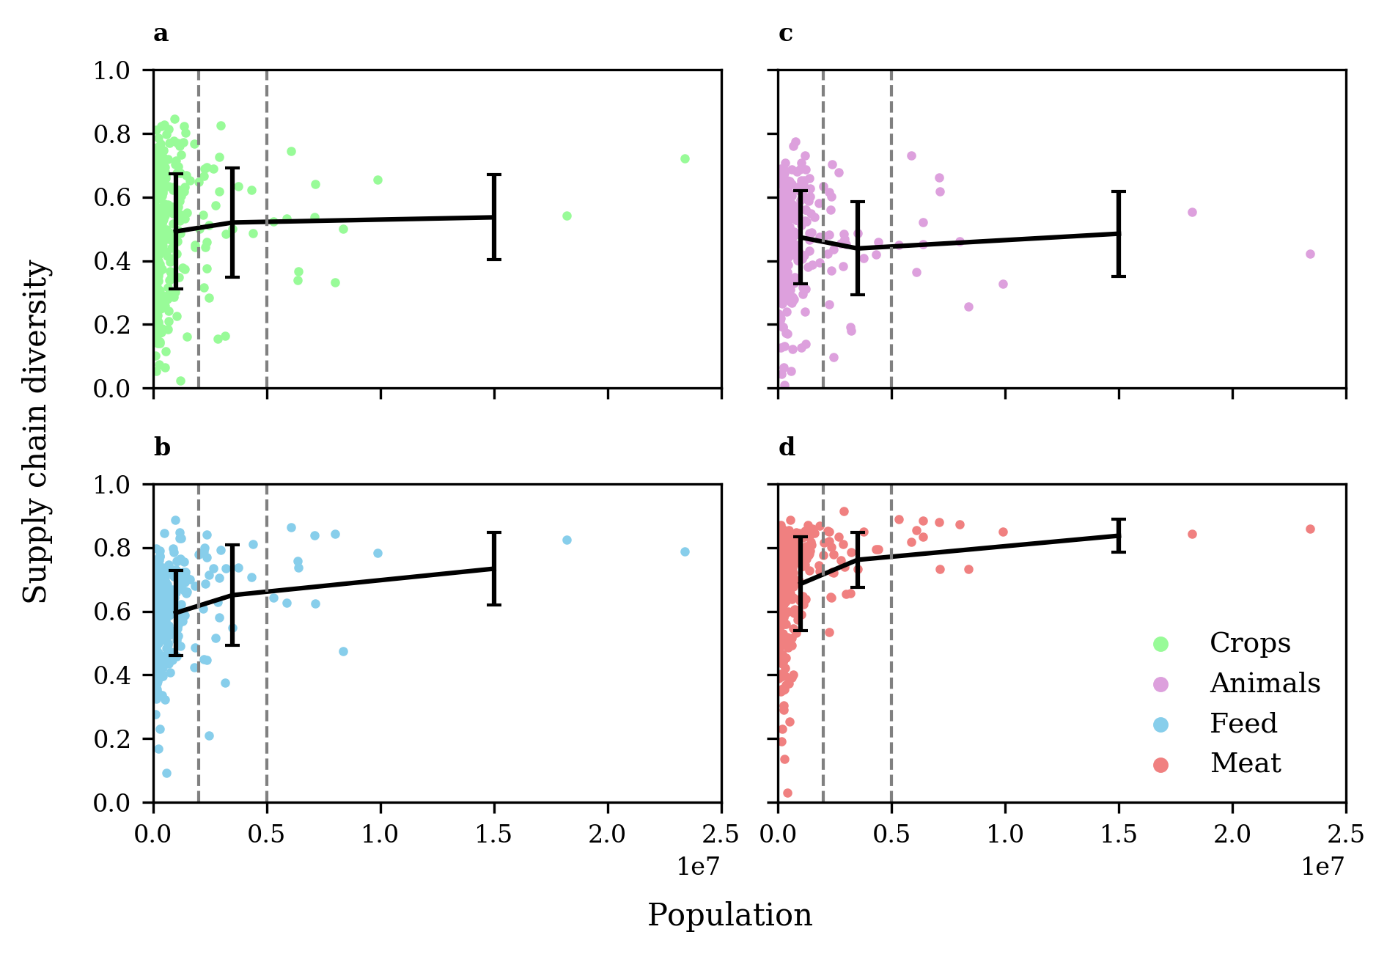
**Extended Data Fig. 1:** Relationship between population and supply chain diversity for a) crops, b) animal feed, c) live animals and d) meat. The black line and error bars show the mean and standard deviation of diversity within the bins (grey dotted lines). For all food sectors, diversity and population are weakly correlated with Pearson correlation coefficients of 0.10, 0.01, 0.25, and 0.24 for crops, live animals, animal feed and meat, respectively. Cities with population greater than 5 million have higher diversity for all food sectors with the exception of live animals.


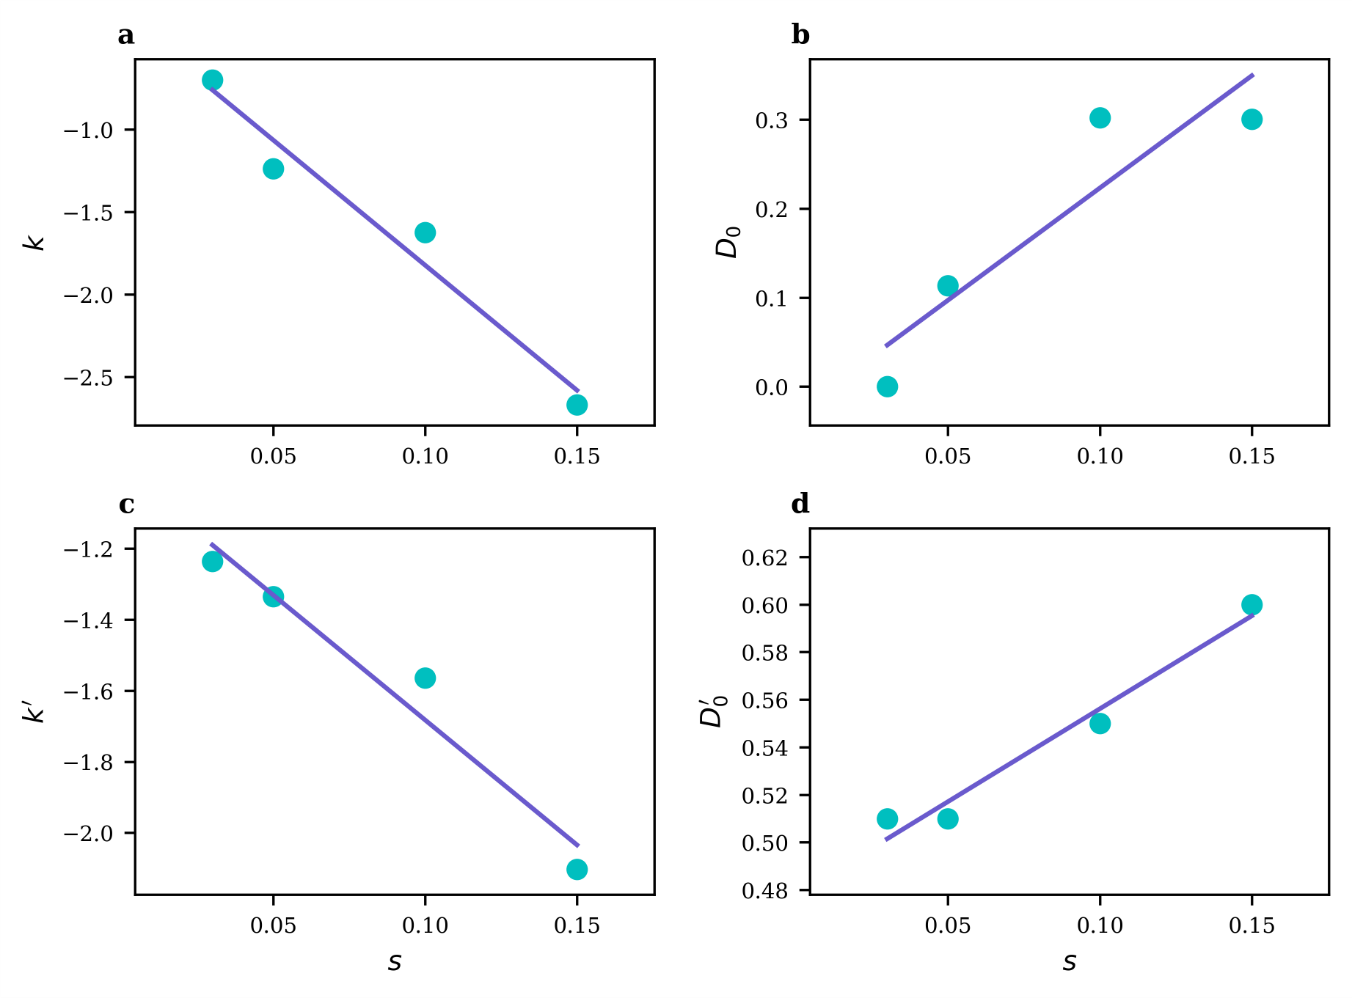


**Extended Data Fig. 2:** Relationship between the shock intensity *s* and the exponential regression parameters for single (a, b) and co-occurring shocks (c, d). The lines are the linear regression fits.


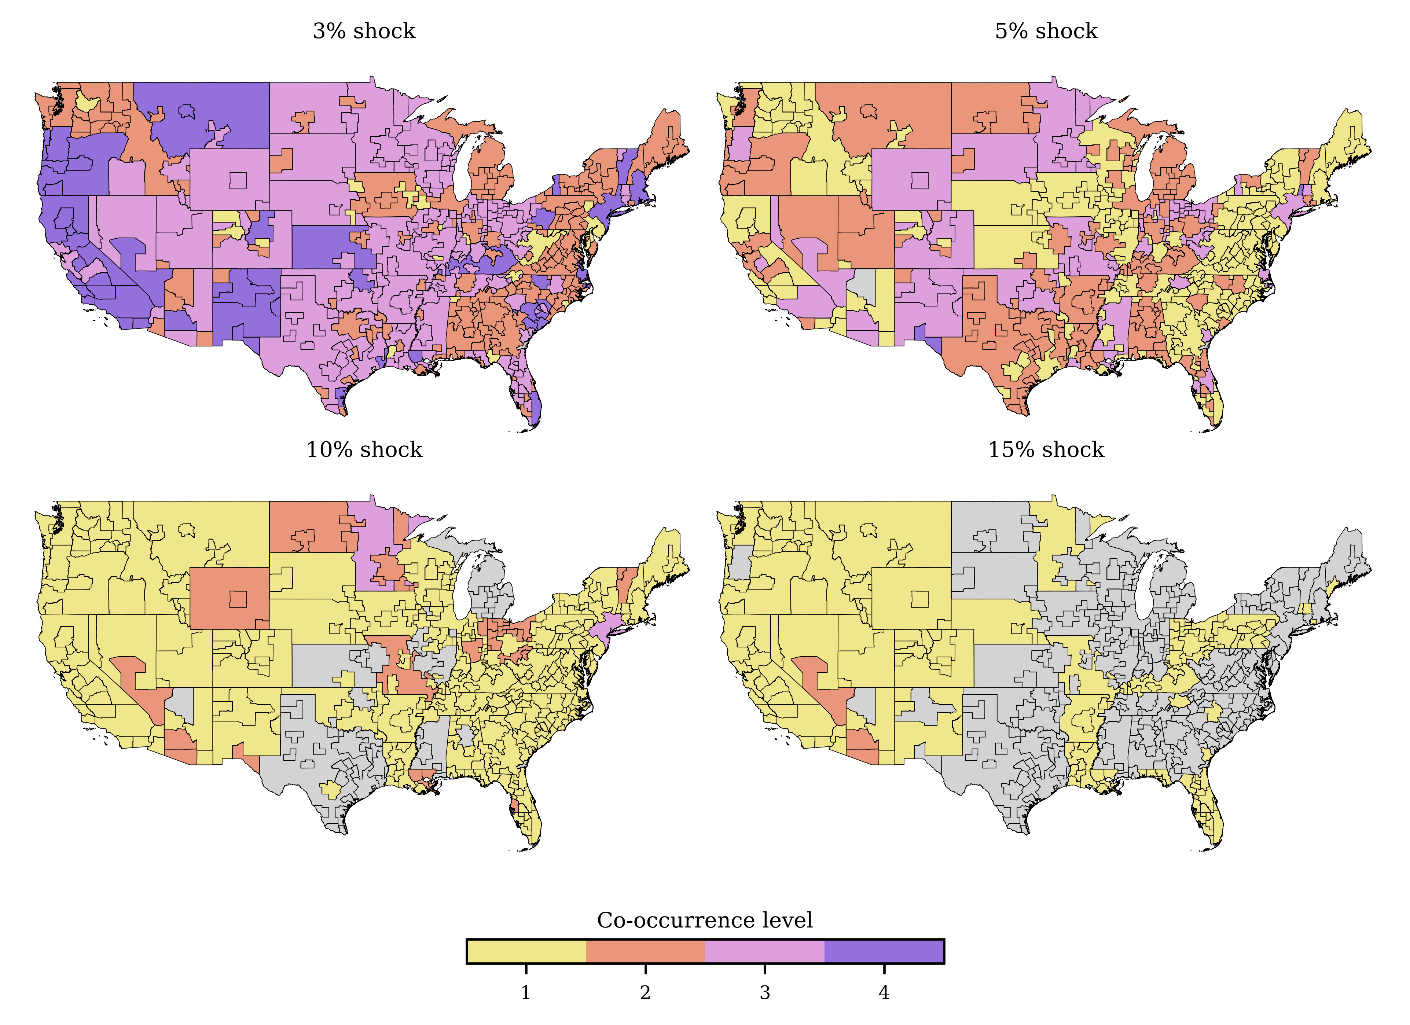


**Extended Data Fig. 3:** Level of co-occurrence of food supply shocks across the United States. For a given shock intensity (3, 5, 10 and 15%), the co-occurrence level is measured as the number of food supply shocks from different food sectors to a geographic location during 2012-2015, out of a possible maximum of 4 shocks. The maps show the level of co-occurrence for different shock intensities. The overall co-occurrence level across the United States tends to decline as the threshold increases, meaning that co-occurrence becomes less likely for higher shock intensities.

**
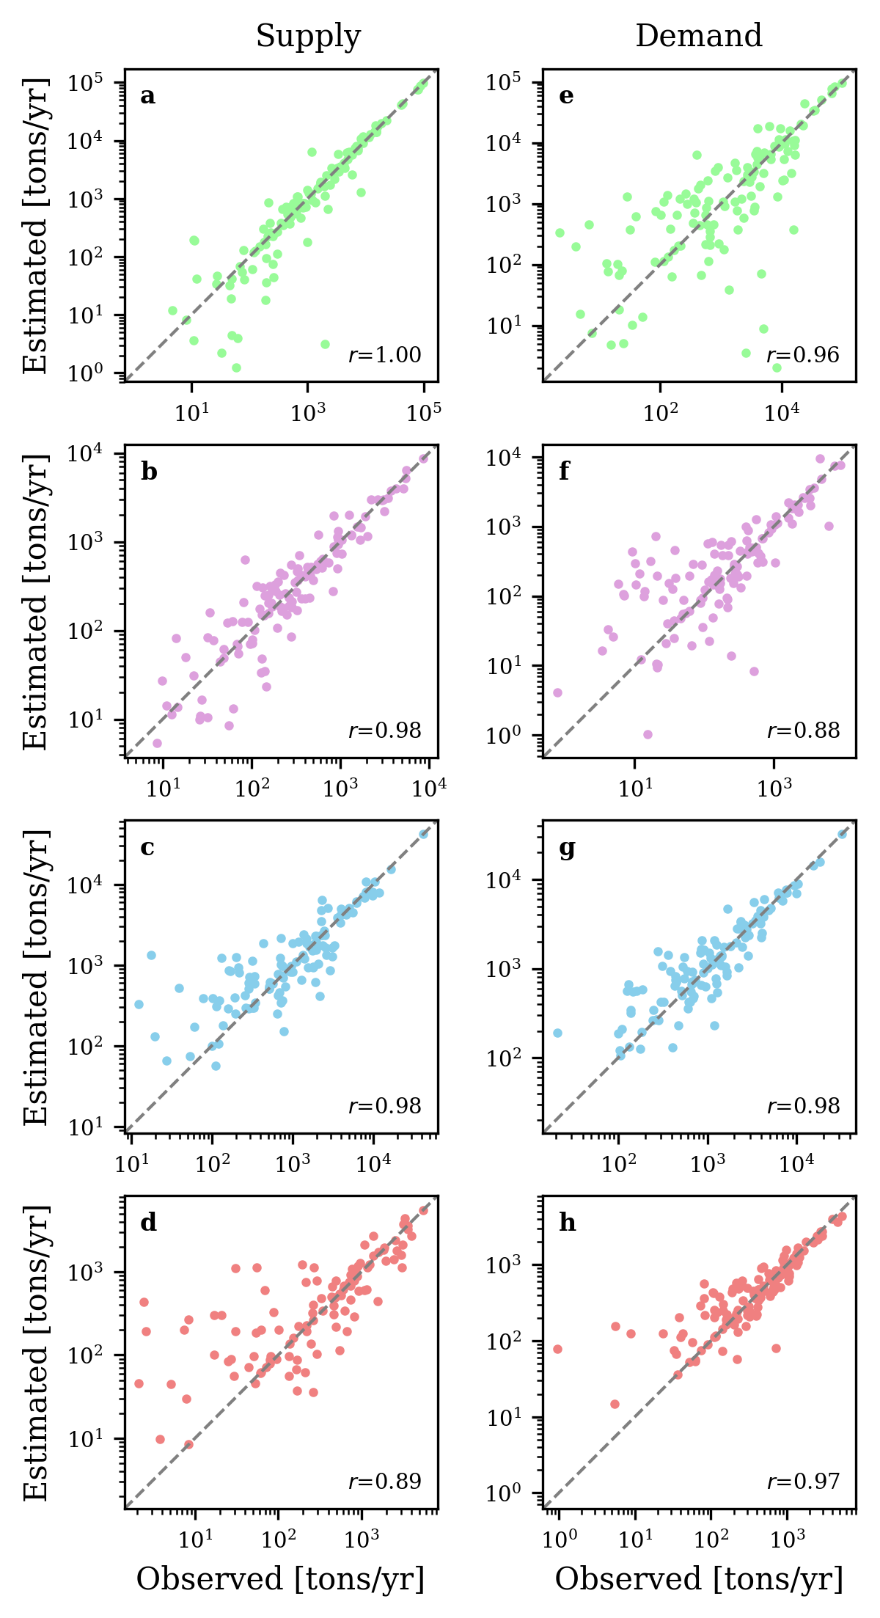
**

**Extended Data Fig. 4:** Comparison between observed and disaggregated food supply (a-d) and demand (e-h) flows for crops (a and e), live animals (b and f), feed (c, g) and meat (d, h). Different socioeconomic and agricultural variables (methods) were tested and those that resulted in the highest values of the Pearson correlation coefficient *r* were used in the disaggregation. For the crop sector, disaggregated flows using agricultural land as an attractor yielded the highest *r* between observed and disaggregated flows for both supply and demand. For the live animals and feed sector, the flows disaggregated by number of establishments resulted in the highest *r* for both supply and demand. For the meat sector, the number of establishments resulted in the highest *r* value for supply and population for demand.


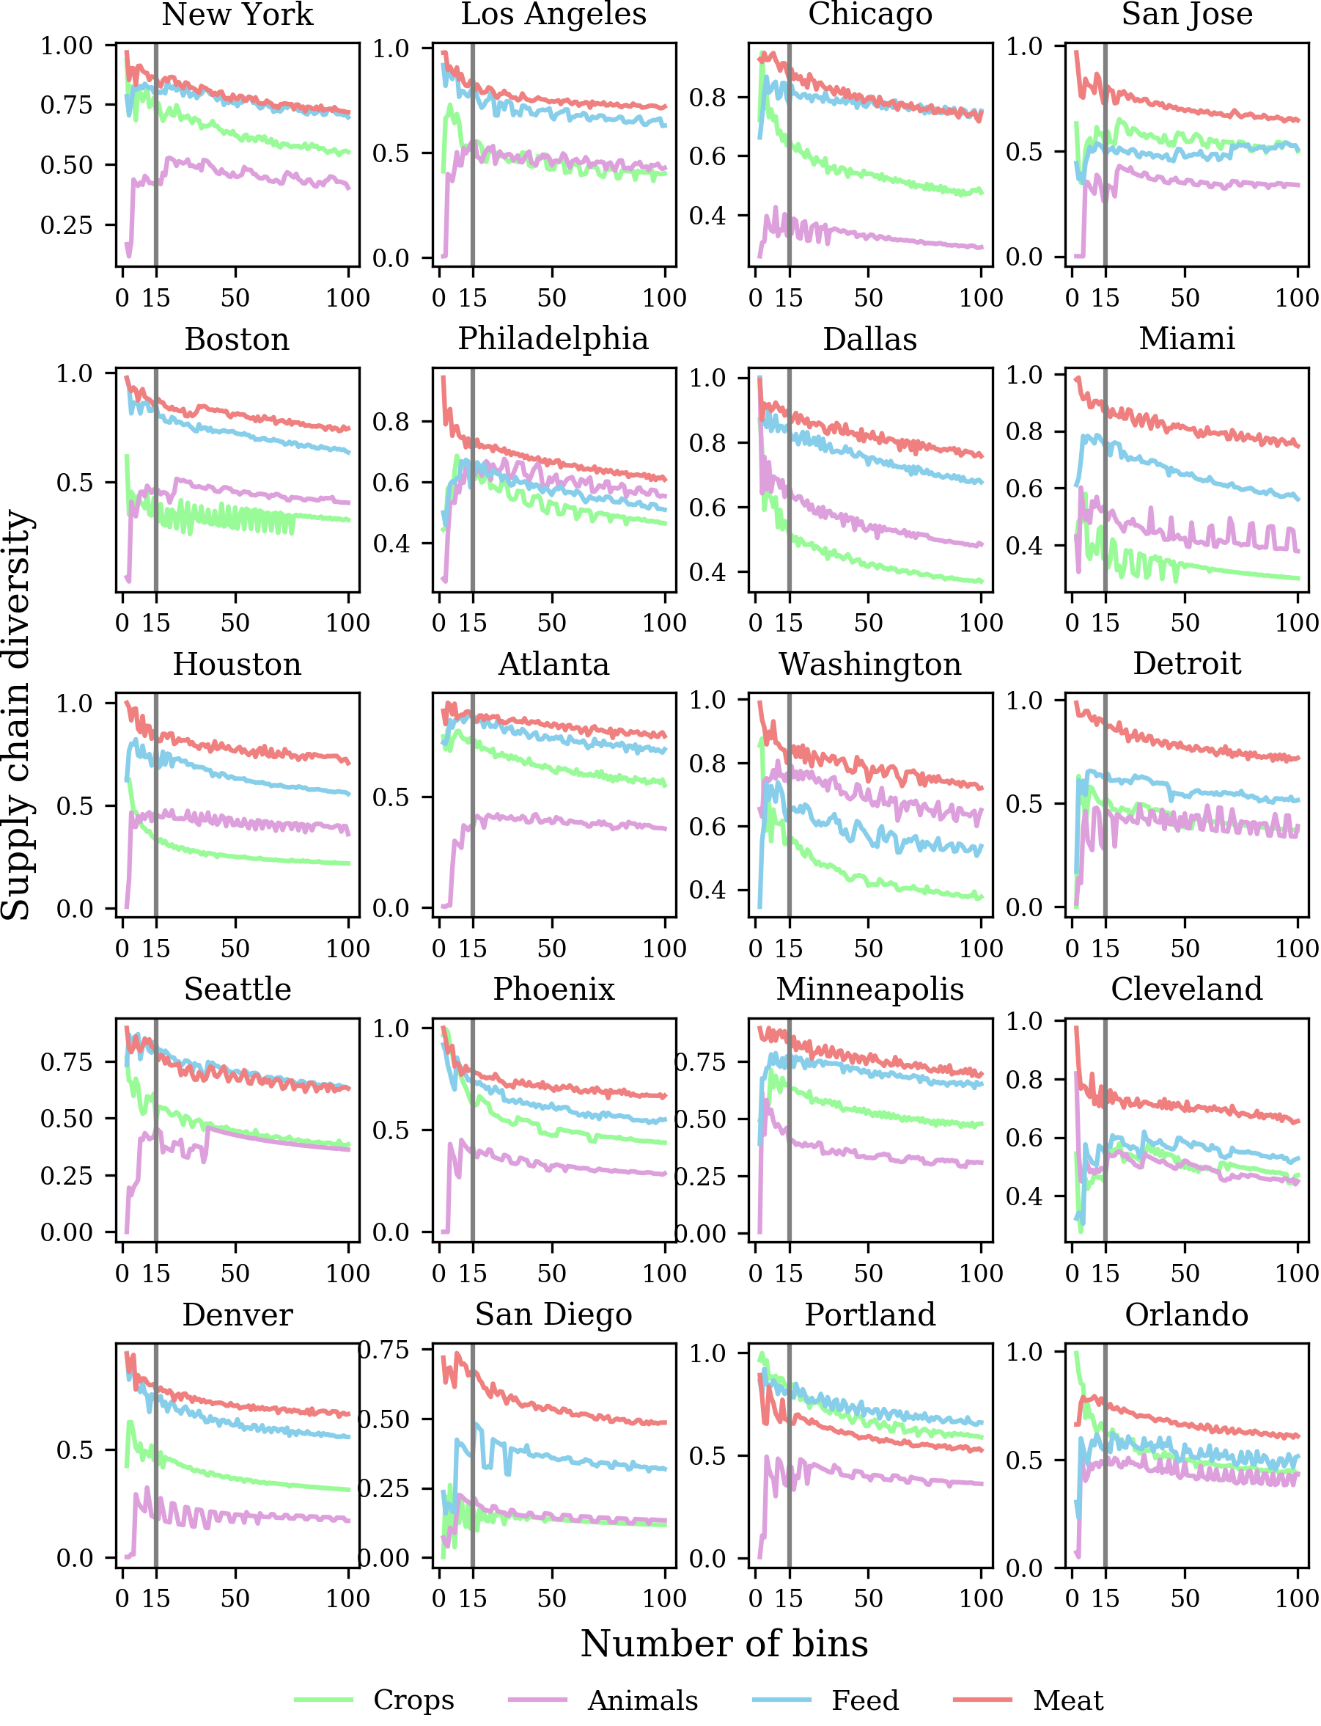


**Extended Data Fig. 5:** Selection of the optimal bin number for the calculation of supply chain diversity for the top 20 most populous cities in the United States. The plots show that diversity varies erratically in the range 0-15 bins but after 15 bins the diversity measure stabilizes.

**Extended Data Table 1.** Goodness of fit for the exponential regression between the probability of shock and supply chain diversity. The regression has the form and is bounded at and .

| **Regression Parameters** | ***s*** | | | |
| --- | --- | --- | --- | --- |
| **3%** | **5%** | **10%** | **15%** |
| *ks* | -0.699 | -1.237 | -1.623 | -2.667 |
| | *D*0,*s* | | --- | | 0.000 | 0.114 | 0.302 | 0.301 |
| RMSE | 0.09 | 0.06 | 0.04 | 0.03 |
| | *R2* | | --- | | 0.74 | 0.87 | 0.88 | 0.89 |
| Confidence Interval (*k*) | -1.46, -0.14 | -1.92, -0.56 | -2.49, -0.76 | -4.13, -1.20 |

**Extended Data Table 2.** Goodness of fit for the linear regression between the parameters *k* and *D0* and the shock intensity *s*.

| **Regression Parameters** |  |  |
| --- | --- | --- |
| Intercept | -0.306 | -0.029 |
| Slope | -15.166 | 2.524 |
| p-value | 0.02 | 0.09 |
| | *R2* | | --- | | 0.961 | 0.830 |
| Confidence Interval (Slope) | -24.46, -5.87 | -0.91, 5.95 |

**Extended Data Table 3.** Probability of shock equations for different shock intensities *s*. The minimum, *P*(*D* = 1), and maximum, *P*(*D* = 0), probability values are also shown.

| ***S* [%]** | **Equation** | ***P*(*D* = 0)** | ***P*(*D* = 1)** |
| --- | --- | --- | --- |
| 1 |  | 1.000 | 0.631 |
| 2 |  | 0.987 | 0.534 |
| 3 |  | 0.965 | 0.449 |
| 4 |  | 0.936 | 0.374 |
| 5 |  | 0.902 | 0.310 |
| 6 |  | 0.861 | 0.254 |
| 7 |  | 0.817 | 0.207 |
| 8 |  | 0.769 | 0.168 |
| 9 |  | 0.718 | 0.134 |
| 10 |  | 0.665 | 0.107 |
| 11 |  | 0.612 | 0.085 |
| 12 |  | 0.559 | 0.066 |
| 13 |  | 0.506 | 0.052 |
| 14 |  | 0.455 | 0.040 |
| 15 |  | 0.406 | 0.031 |
| 16 |  | 0.359 | 0.023 |
| 17 |  | 0.315 | 0.018 |
| 18 |  | 0.275 | 0.013 |
| 19 |  | 0.238 | 0.010 |
| 20 |  | 0.204 | 0.007 |
| 21 |  | 0.174 | 0.005 |
| 22 |  | 0.147 | 0.004 |
| 23 |  | 0.123 | 0.003 |
| 24 |  | 0.103 | 0.002 |
| 25 |  | 0.085 | 0.0014 |
| 26 |  | 0.070 | 0.0010 |
| 27 |  | 0.057 | 0.0007 |
| 28 |  | 0.046 | 0.0005 |
| 29 |  | 0.037 | 0.0003 |
| 30 |  | 0.029 | 0.0002 |

**Extended Data Table 4.** Goodness of fit for the exponential regression between the probability of co-occurring shocks and supply chain diversity. The regression has the form bounded at and .

| **Regression Parameters** | ***s*** | | | |
| --- | --- | --- | --- | --- |
| **3%** | **5%** | **10%** | **15%** |
|  | -1.24 | -1.34 | -1.56 | -2.10 |
| |  | | --- | | 0.51 | 0.51 | 0.55 | 0.60 |
| RMSE | 0.03 | 0.02 | 0.03 | 0.04 |
| | *R2* | | --- | | 0.74 | 0.95 | 0.89 | 0.81 |
| Confidence Interval () | -1.37, -1.13 | -1.42, -1.28 | -1.72, -1.41 | -2.47, -1.74 |

**Extended Data Table 5.** Goodness of fit for the linear regression between the parameters *k′* and and the shock intensity *s*.

| **Regression Parameters** |  |  |
| --- | --- | --- |
| Intercept | -0.98 | 0.48 |
| Slope | -7.03 | 0.78 |
| p-value | 0.02 | 0.02 |
| | *R2* | | --- | | 0.95 | 0.97 |
| Confidence Interval (Slope) | -11.74, -2.32 | 0.34, 1.22 |
